# Supplementary material for: Genetic mapping of cell type specificity for complex traits
Source: PubMed Central journal article supplement (PMC6642112; doi:10.1038/s41467-019-11181-1), 2019-07-19
Supplement: 41467_2019_11181_MOESM4_ESM.pdf [file 41467_2019_11181_MOESM4_ESM.pdf]

## **Description of Additional Supplementary Files**

### **Supplementary Data 1.**

scRNA-seq datasets

### **Supplementary Data 2.**

Details of scRNA-seq datasets pre-process

### **Supplementary Data 3.**

Cell type description and tSNE coordinates

### **Supplementary Data 4.**

Tissue specificity analyses with GTEx v7 53 tissues.

### **Supplementary Data 5.**

Full results of cell type specificity analyses for 26 traits.
